# Supplementary material for: Simultaneous multifunctional transcriptome engineering by CRISPR RNA scaffold
Source: PubMed Central journal article supplement (PMC10415119; doi:10.1093/nar/gkad547), 2023-07-03
Supplement: gkad547_supplemental_file.pdf [file gkad547_supplemental_file.pdf]

# **Simultaneous multifunctional transcriptome engineering by CRISPR RNA scaffold**

Zukai Liu<sup>1,2</sup>, Nathaniel Jillette<sup>1</sup>, Paul Robson<sup>1,2,3,4</sup>, Albert Cheng<sup>1,2,3,4,5\*</sup>

<sup>1</sup> The Jackson Laboratory for Genomic Medicine, Farmington, CT 06032, USA

<sup>2</sup> Department of Genetics and Genome Sciences, University of Connecticut Health Center, Farmington, CT 06030, USA

<sup>3</sup> The Jackson Laboratory Cancer Center, Bar Harbor, ME 04609, USA

<sup>4</sup> Institute for Systems Genomics, University of Connecticut Health Center, Farmington, CT 06030, USA

<sup>5</sup> School of Biological and Health Systems Engineering, Arizona State University, Tempe, AZ 85281, USA

\* To whom correspondence should be addressed. Tel: +1 602-543-6735 ; Fax: +1 480-727-7624; Email: [albert@cheng.bio](mailto:albert@cheng.bio)

## **SUPPLEMENTARY INFORMATION**

### **Supplementary Figures S1-S17**

### **Supplementary Protein Sequences**

### **Supplementary Table S1: Oligo sequences**

### **Supplementary Table S2: Plasmids on addgene**

## Supplementary Figures

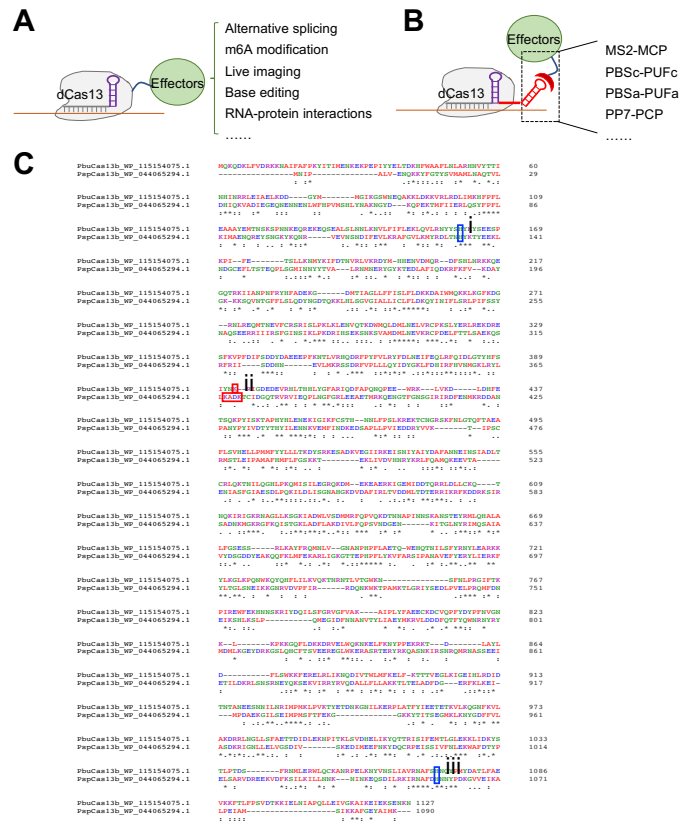

**Supplemental figures S1. Combinatorial RNA Editing via Scaffold Tagged gRNA** (A) Conventional CRISPR/Cas13 mediated RNA editing. gRNA consists of two parts, the spacer (gray) to match with targeting transcripts and the direct repeats (DR, purple) to bind with Cas13 protein. Different effector can be fused with dCas13 to execute different functions as indicated. (B) In CREST system, one or multiple copies of scaffold RNA motif (red) are added to the 3' end of gRNA and can be recognized and bound by specific RNA binding domains (RBDs). Effectors are fused with RBDs for RNA manipulation. Some scaffold RNA motifs and their cognate RBDs are listed at the right. (C) Alignment of PbuCas13b and PspCas13b. The amino acids in blue rectangle are mutated to alanine to generate the dCas13 and the amino acids in red rectangle are mutated to alanine to disable the crRNA processing activity of Cas13 in the dCas13b<sup>A4</sup>.

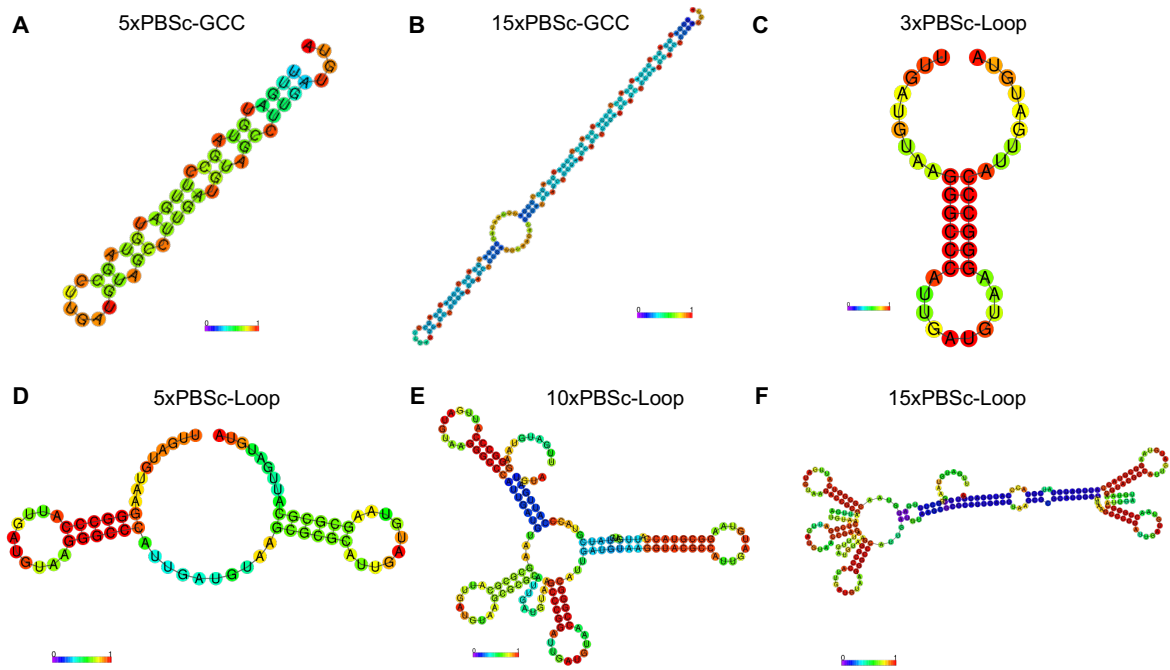

**Supplemental figures S2 Predicted secondary structures of PBSc scaffolds by online tool RNAfold.** (A-B) 5 and 15 copies of PBSc with GCC linker. The sequence of PBSc is UUGAUGUA. (C-F) Different copies of PBSc stabilized by high GC content stem-loops. 3/5/10/15 copies from C-F separately.

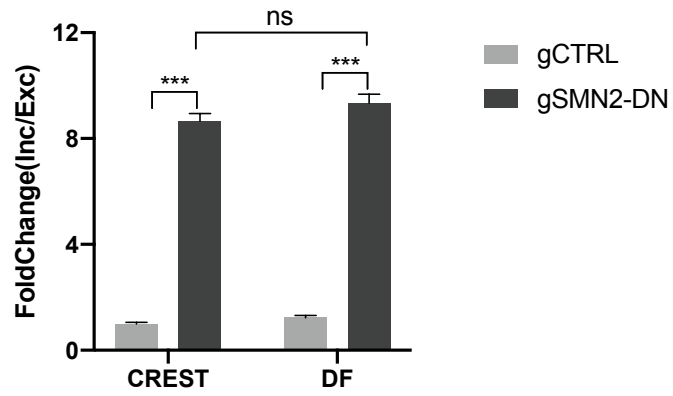

**Supplementary figure S3. Comparison of CREST (PUFc-RBFOX1) and direct fusion (DF, dPspCas13b-RBFOX1) on induction of exon inclusion on *SMN2* minigene reporter.** For CREST, gRNAs with 10xPBase with loop were used. All data were displayed as mean  $\pm$  SD, n = 3. \*P<0.05, \*\* P < 0.01, \*\*\*P<0.001, \*\*\*\*P<0.0001, ns, not significant, by two-sided t-test.

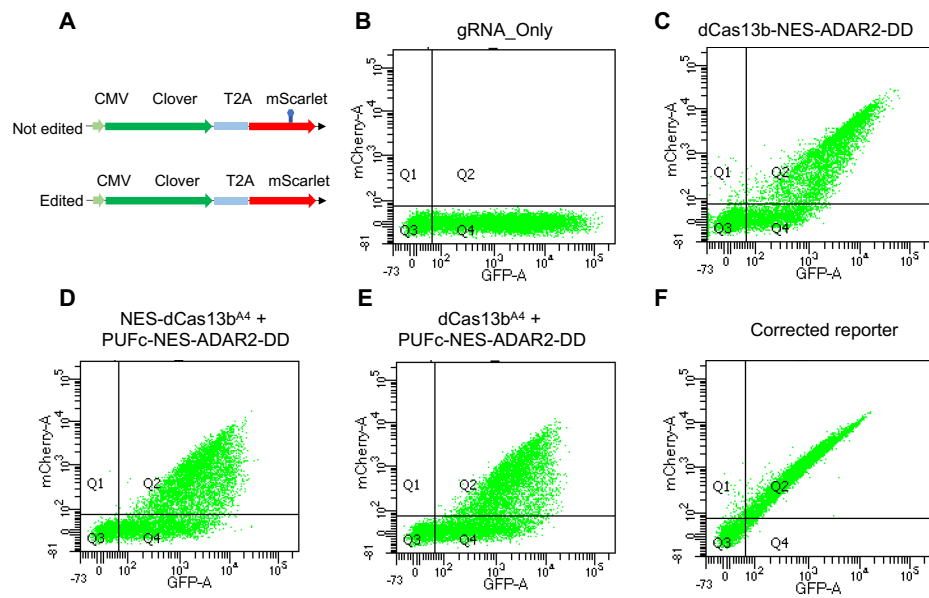

**Supplementary figure S4. Representative flow cytometry plots of A-to-G editing by CREST.** (A) Diagram of reporter construct for A-to-G editing with a premature stop codon in mScarlet (upper) and the corrected reporter without mutation (lower). (B-E) HEK293T cells were co-transfected with reporter minigene harboring premature stop codon in the coding region of mScarlet and direct fusion or CREST components for correcting this mutation as indicated on the top. (F) HEK293T cells were transfected with reporter minigene without premature stop codon in mScarlet as a positive control.

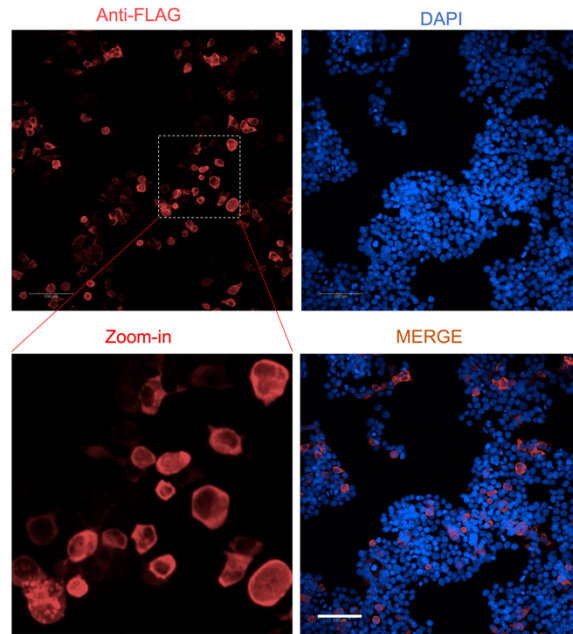

**Supplementary figures S5. Sub-cellular localization of dCas13b<sup>A4</sup> without NES.** HEK293T cells were transfected with FLAG-dCas13b<sup>A4</sup> and stained with anti-FLAG antibody and DAPI, imaged by Phenix. Scale bar: 100  $\mu$ m.

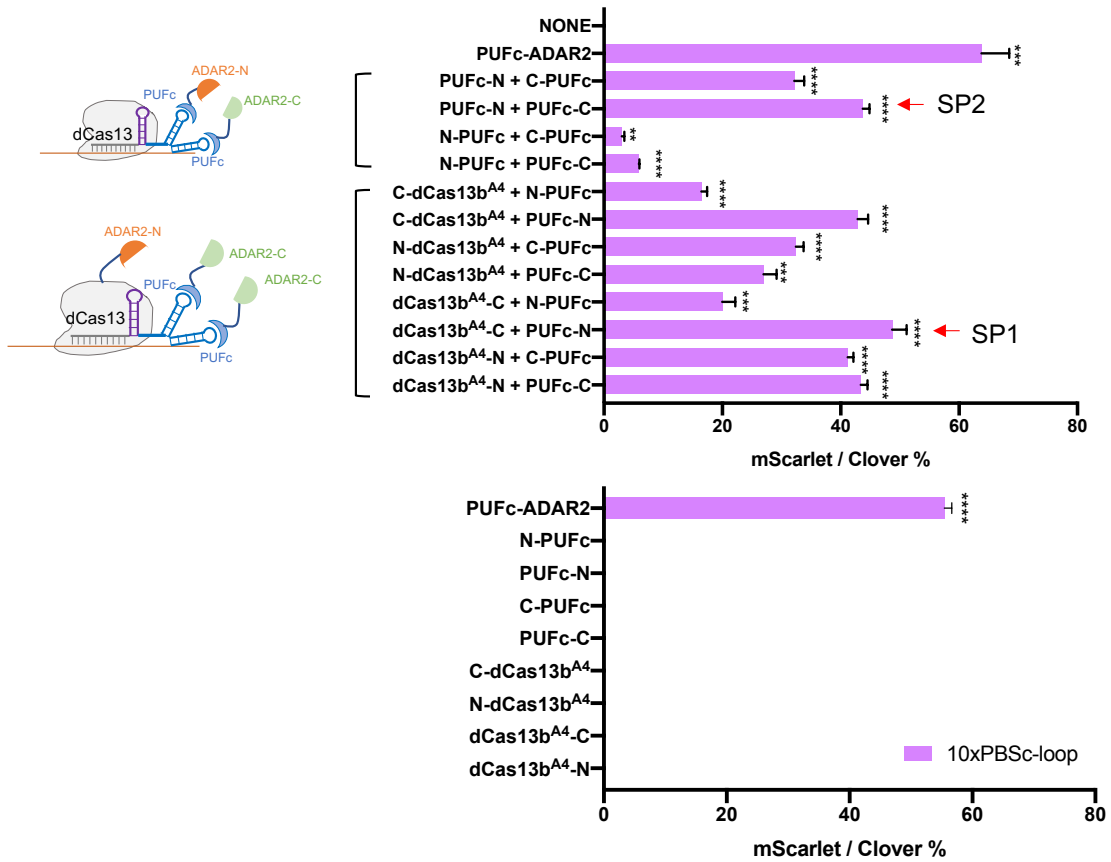

**Supplementary figures S6. Half of split ADAR2-DD is insufficient for A-to-G editing.** Top: HEK293T cells were transfected with different combinations of split ADAR2-DD and gRNA tagged with 10xPBSc loop. Bottom: HEK293T cells were transfected with either halves of split ADAR2-DD and showed no activity for A-to-G editing. Data were displayed as mean  $\pm$  S.E.M,  $n = 3$ . \* $P < 0.05$ , \*\* $P < 0.01$ , \*\*\* $P < 0.001$ , \*\*\*\* $P < 0.0001$ , ns, not significant, by two sided t-test.

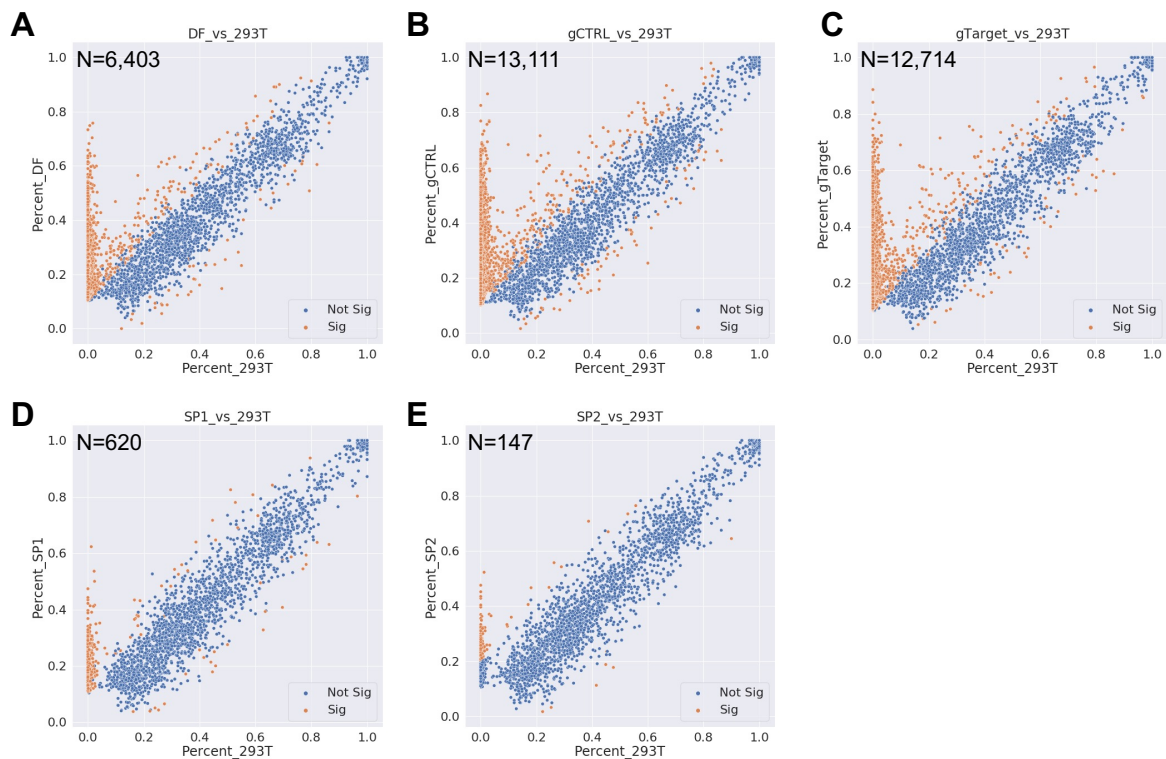

**Supplemental figures S7. Transcriptome-wide off-target analysis of A-to-G editing.** 2D scatter plot comparing the A-to-G editing yields observed with each construct (y-axis) to the yields observed with the control sample (x-axis, plain 293T). (A) HEK293T cells transfected with direct fusion of dCas13-ADAR2-DD. (B-C) gCtrl and gTarget stand for HEK293T cells co-transfected with dCas13b<sup>A4</sup>, PUFc-ADAR2-DD and indicated non-targeting control or on-target gRNAs, respectively. (D-E) Reconstitution of base editing activities of ADAR2-DD activity at split sites SP1 or SP2. Dots highlighted in red stand for sites with significant changes in A-to-G editing yields compared to plain 293T without transfection. The number of significant differentially edited sites (N) is listed in each comparison at the top left.



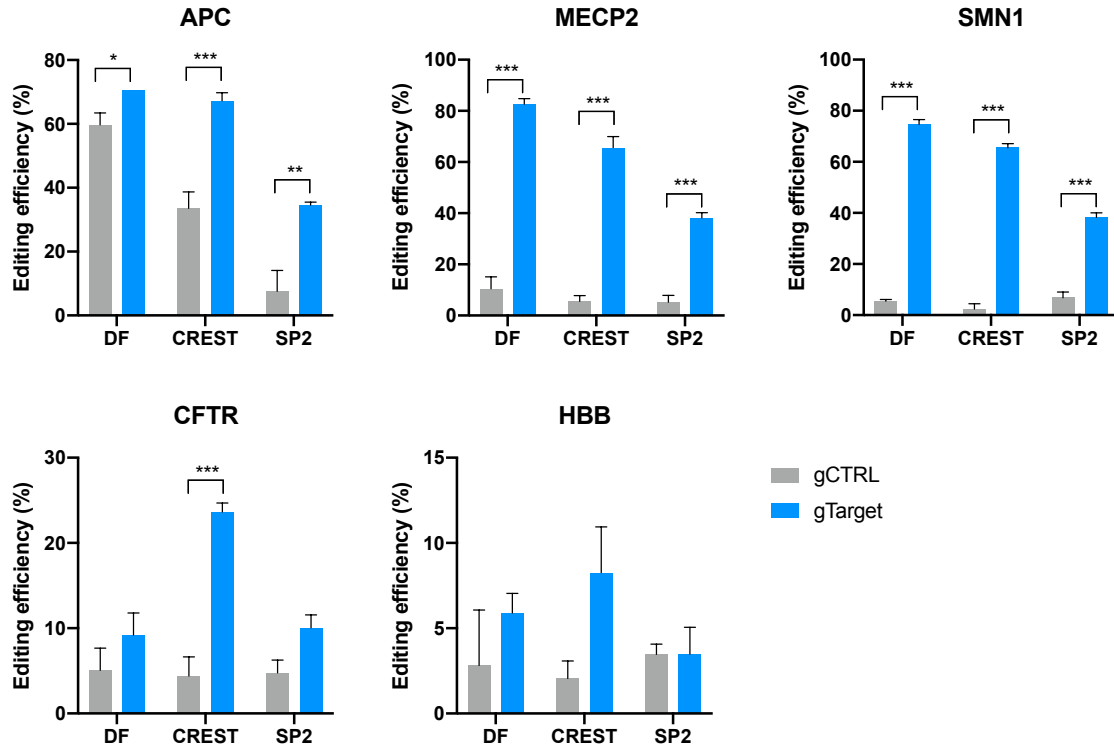

**Supplemental figures S8. A-to-G editing of disease-relevant mutations on reporters by CREST system.** Editing efficiency was measured by RT-PCR followed by sanger sequencing (Y axis) and different treatments were annotated as X axis. DF: dCas13-ADAR2-DD. CREST: dCas13b<sup>A4</sup>+PUFc-ADAR2-DD. SP2: dCas13b<sup>A4</sup>-ADAR2-DD-C + PUFc-ADAR2-DD-N. The target gene name is shown above each graph. Gray columns stand for the non-targeting control gRNA and blue columns stand for on-target gRNAs. All gRNAs were tagged with 3xPBSc and designed with mismatch distance of 22. Data were displayed as mean  $\pm$  S.E.M, n = 3. \*P<0.05, \*\* P < 0.01, \*\*\*P<0.001, by two-sided t-test.

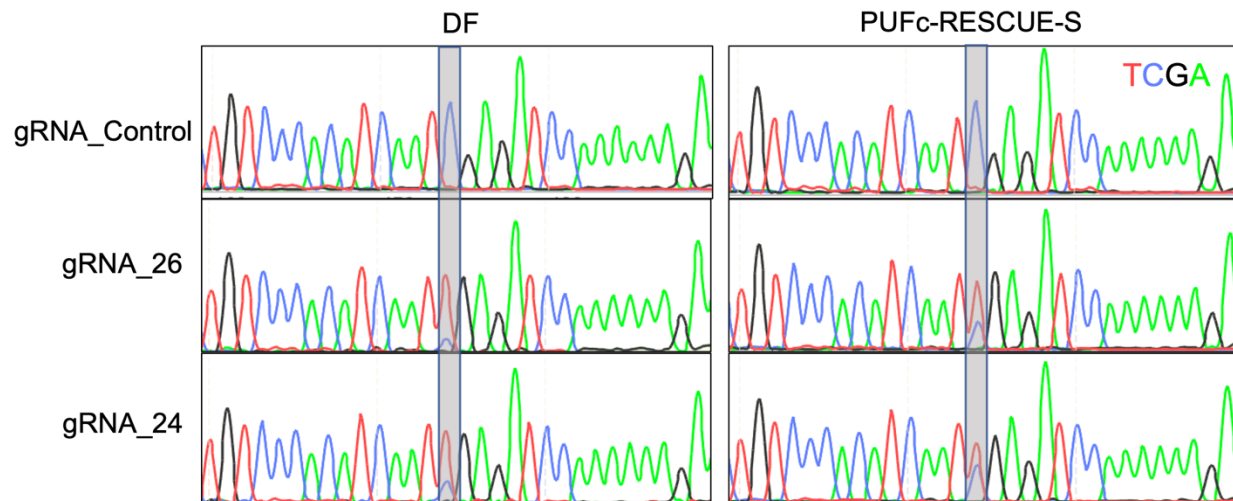

**Supplemental figures S9. Representative electropherograms showing Sanger sequencing results of C-to-U base editing.** Non-targeting control and on-target gRNA with 24nt and 26nt of mismatch distance were showed. DF stands for dCas13-RESCUE-S. Targeting site was highlighted in gray and colors for different bases were annotated on the top right.

```

ADAR2-DD      QLHLPQVLADAVSRLVLGKFGDLTDNFSSPHARRKVLAVVMTTGTVDKDAKVISVSTGT
RESCUE-S      QLHLPQVLADAVSRLVIGKFGDLTDNFSSPHARRIGLAGVVMVTGTVDKDAKVICVSTGA
*****:*****:*****:*****:*****:

ADAR2-DD      KCINGEYMSDRGLALNDCHAEIISRSLRFLYTQLELYLNNKDDQKRSIFQKSERGGFR
RESCUE-S      KCINGEYLSDRGLALNDCHAEIVSRSLRFLYTQLELYLNNEDDQKRSIFQKSERGGFR
*****:*****:*****:*****:*****:

ADAR2-DD      LKENVQFHLYISTSPCGDARIFSPHEPILEEADRHHPNRKARGQLRTKIESGQGTIPVRS
RESCUE-S      LKENIQFHLYISTSPCGDARIFSPHEAILEEADRHHPNRKARGQLRTKIEAGQGTIPVRN
*****:*****:*****:*****:*****:

ADAR2-DD      NASIQTDGVLQGERLLTMSCSDKIARWNVVGIQGSLLSIFVEPIYFSSIILGSLYHGDH
RESCUE-S      NASIQTDGVLQGERLLTMSCSDKIARWNVVGIQGSLLSIFVEPIYFSSIILGSLYHGDH
*****:*****:*****:*****:*****:

ADAR2-DD      LSRAMYQRISNIEDLPPLYTLNKPLLSGISNAEARQPGKAPNFSVNWTVGDSAIEVINAT
RESCUE-S      LSRAMYQRISNIEDLPPLYTLNKPLLTGISNAEARQPGKAPIFS VNWTVGDSAIEVINAT
*****:*****:*****:*****:*****:

ADAR2-DD      TGKDELGRASRLCKHALYCRWVRVHGKVP SHLLRSKITKPNVYHESKLAKEYQAAKARL
RESCUE-S      TGKDELGRASRLCKHALYCRWVRVHGKVP SHLLRSKITKPNVYHETKLAKEYQAAKARL
***:*****:*****:*****:*****:

ADAR2-DD      FTAFIKAGLGAWVEKPT EQDQFSLT 385
RESCUE-S      FTAFIKAGLGAWVEKPT EQDQFSLT 385
*****

```

**Supplemental figures S10. Alignment of ADAR2-DD and RESCUE-S protein sequences.** The conserved motif for splitting is highlighted in red and split site is indicated by red arrow between E and P.

QLHLPQVLADAVSRLVIGKFGDLTDNFSSPHARRIG  
 LAGVVMTTGTDVKDAKVICVSTGAKCINGEYLSDR  
 GLALNDCHAEIVSRRSLLRFLYTQLELYLNNEDDQK  
 RSIFQKSERGGFRLKENIQFHLYISTSPCGDARIFSP  
 HEAILEEPADRHPNRKARGQLRTKIEAGQGTIPVRN  
 NASIQTWGVLQGERLLTMSCSDKIARWNVVGIQG  
 SLLSIFVEPIYFSSIILGSLYHGDHLSTRAMYQRISNIE  
 DLPPLYTLNKPLLTGISNAEARQPGKAPIFSVNWTV  
 GDSAIEVINATTGKGELGRASRLCKHALYCRWMRV  
 HGKVPSHLLRSKITKPNVYHETKLAKEYQAAKARL  
 FTAFIKAGLGAWVEKPTEQDQFSLT

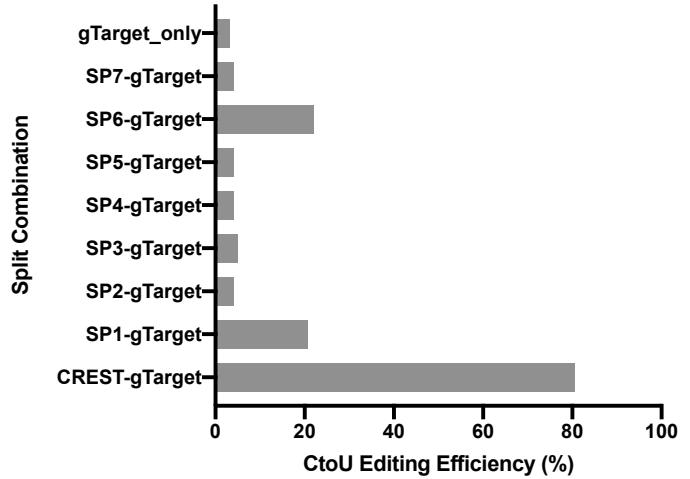

**Supplemental figures S11. Optimization of split RESCUE-S.** Left: Locations of 7 split sites designed at the low energy regions of RESCUE-S enzyme. Right: Editing efficiency of all split versions in the architecture of dCas13bA4-N/PUFc-C (SP1-gTarget to SP7-gTarget) and full-length enzyme fused to PUFC (CREST-gTarget) quantified by RT-PCR and sanger sequencing. n=1.

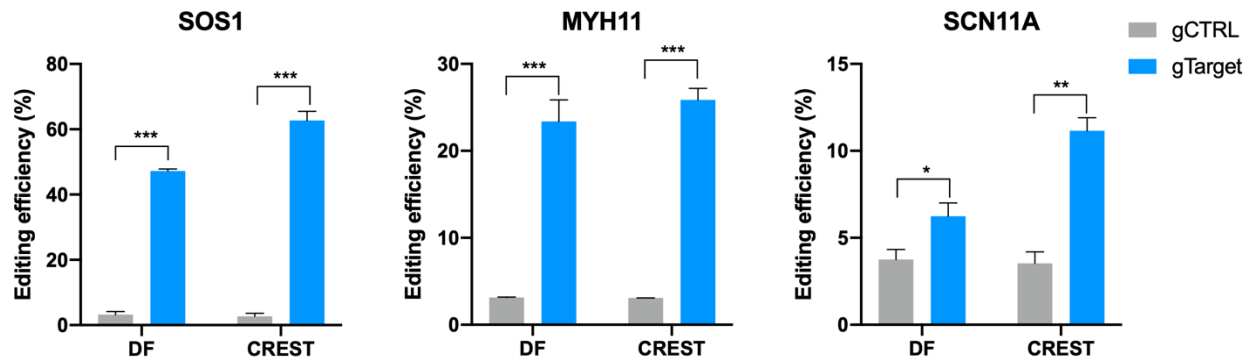

**Supplemental figures S12. C-to-U editing of disease-relevant mutations on reporters by CREST system.** Editing efficiency was measured by RT-PCR followed sanger sequencing (Y axis) and different treatments are annotated on the X axis. DF: dCas13-ADAR2-DD. CREST: dCas13<sup>A4</sup>+PUFc-RESCUE-S. The target gene name is shown above each graph. Gray columns stand for the non-targeting control gRNA and blue columns stand for the on-target gRNAs. All gRNAs were tagged with 3xPBSc and designed with mismatch distance of 22. Data were displayed as mean  $\pm$  SD, n = 3. \*P<0.05, \*\* P < 0.01, \*\*\*P<0.001, by two-sided t-test.

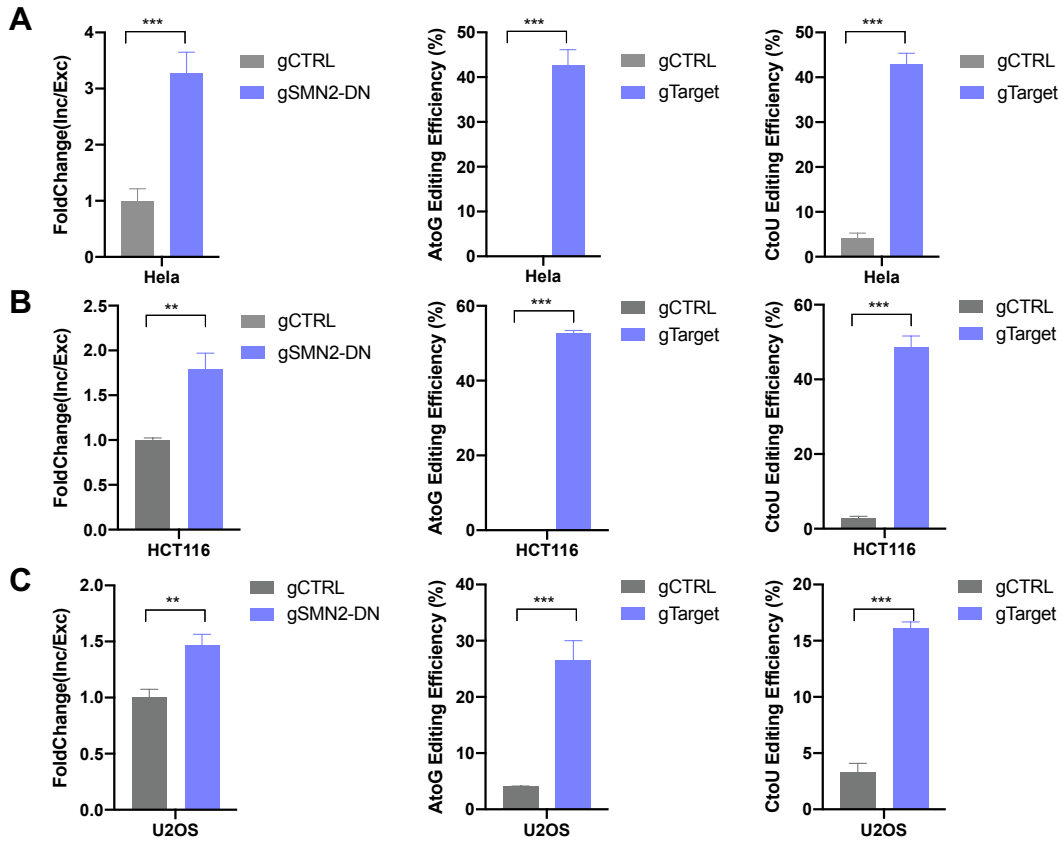

**Supplemental figures S13. Validation of CREST in three different cell lines.** CREST components (dCas13b<sup>A4</sup>, PUFc-effectors and gRNA tagged with PBSc) were co-transfected into HeLa, HCT116 and U2OS lines as indicated (A-C). Cells were collected 48 hours after transfection for analysis. Induction of splicing was quantified by RT-qPCR (left), and A-to-G / C-to-U editing were quantified by RT-PCR followed by sanger sequencing (Middle and right). Data were displayed as mean  $\pm$  SD, n = 3. \*P<0.05, \*\* P < 0.01, \*\*\*P<0.001, by two-sided t-test.

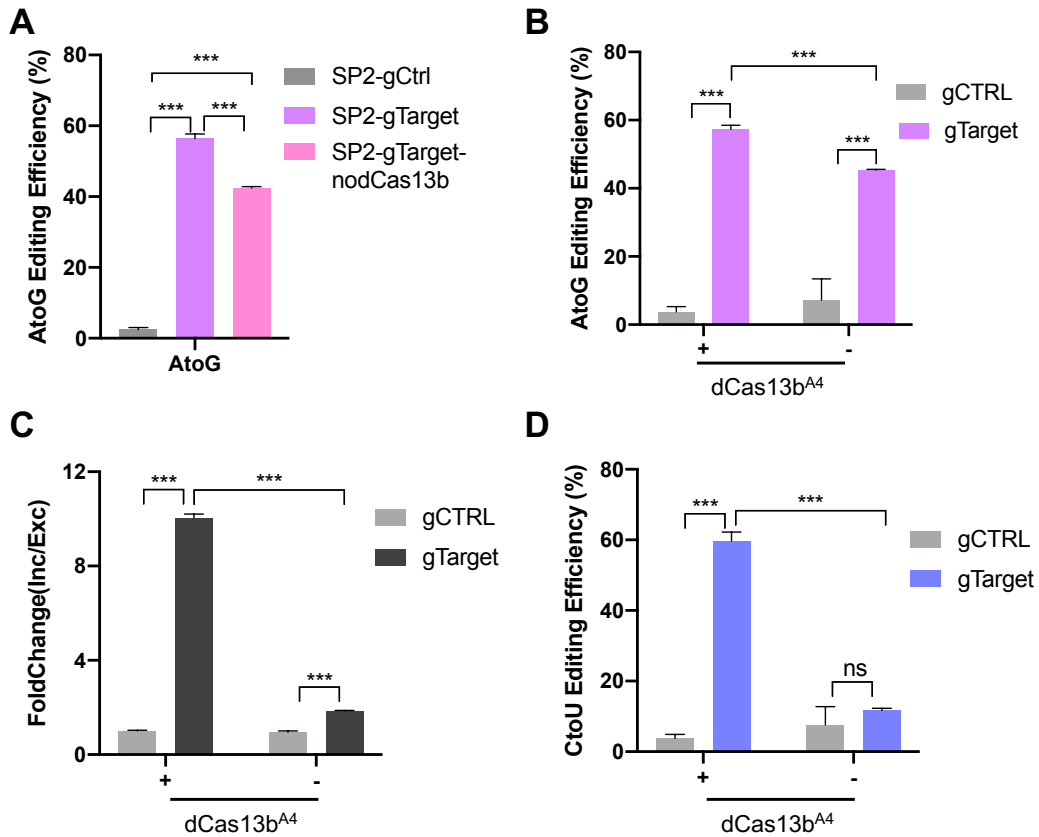

**Supplemental figures S14. Requirement of dCas13b<sup>A4</sup> for different CREST editing modules.** (A) HEK293T cells were co-transfected with the core component of SP2 for A-to-G editing (PUFc-N and PUFc-C, gRNA tagged with PBSc) with or without dCas13b<sup>A4</sup> (SP2-gTarget and SP2-gTarget-nodCas13b). (B-D) HEK293T cells were co-transfected with gRNA tagged with PBSc and CREST-PUFc-ADAR2-DD / CREST-PUFc-RBFOX1 / CREST-PUFc-RESCUE-S for A-to-G editing / splicing / C-to-U editing with or without dCas13b<sup>A4</sup> as indicated at the bottom. Induction of splicing was quantified by RT-qPCR (C), and A-to-G / C-to-U editing were quantified by RT-PCR followed by sanger sequencing (B and D). Data were displayed as mean  $\pm$  SD, n = 3. \*P<0.05, \*\* P < 0.01, \*\*\*P<0.001, by two-sided t-test.

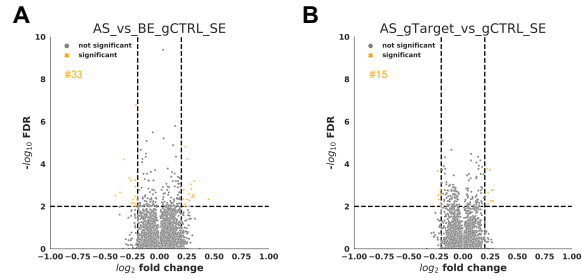

**Supplemental figures S15. Off-target analysis of alternative splicing induced by CREST system.**

Samples from column 1 and 4 in Figure 5 A-C were sent for RNA deep sequencing and subjected to analyze differentially splicing events between groups. (A) Combined all groups transfected with MCP-RBFOX1 and gCTRL (Figure 5A column 1 + 5B column 1) and then compared with HEK293T cells transfected with MCP-ADAR2-DD (AtoG) and PUFc-RESCUE-S (CtoU) and gCTRL (Figure 5C column 1) to evaluate the effect of RBFOX1 itself rather than gRNAs. (B) Combined all groups transfected with MCP-RBFOX1 and compared them based on different gRNAs ([Figure 5A column 4 + 5B column 4] vs [Figure 5A column 1 + 5B column 1]. The significant differentially spliced events were filtered by  $FDR \leq 0.01$  and  $|\text{change of PSI}| > 0.2$ . Numbers of differentially spliced events are shown at the top left (#) on each graph.



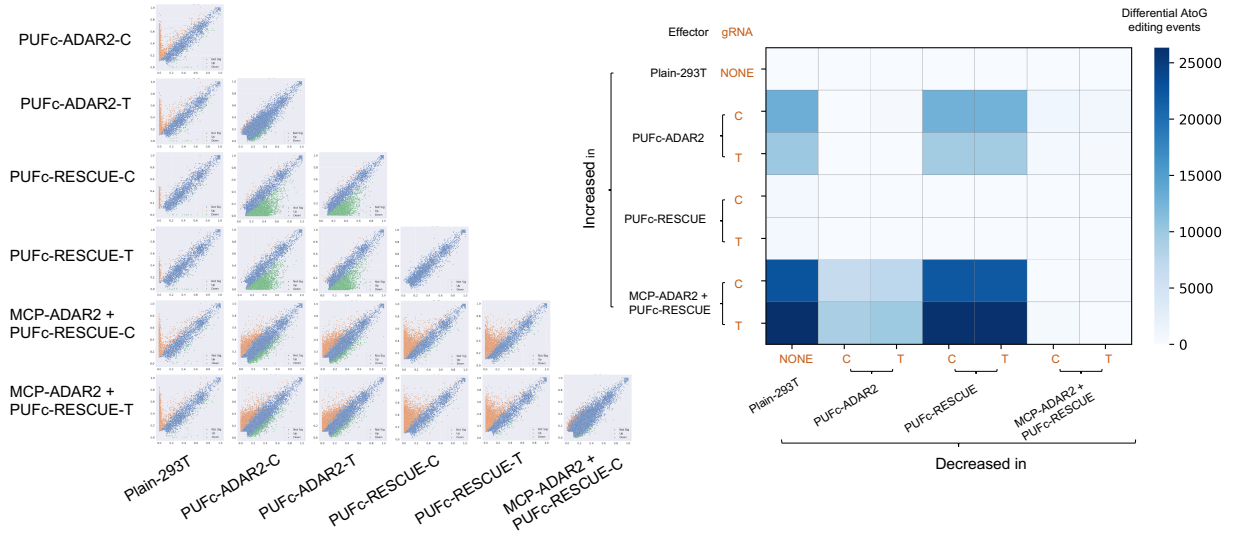

**Supplemental figures S16. Off-target events of A-to-G base editing induced by bi-functional CREST system.** Samples from column 1 and 4 in Figure 5 A-C were sent for RNA deep sequencing and analyzed for differentially edited events between groups. Left: Scatter plot of A-to-G conversion rates on edited sites across all samples and transfected effectors for each comparison were labeled on x and y axis. C stands for control gRNA and T stands for targeting gRNA. Right: Heatmap to summarize the number of differentially edited events for all pairwise comparisons. Effectors and gRNAs were labeled on both y and x axis. Significant differentially edited events were filter by  $FDR \leq 0.05$  and absolute difference in editing percentage  $\geq 10\%$ .

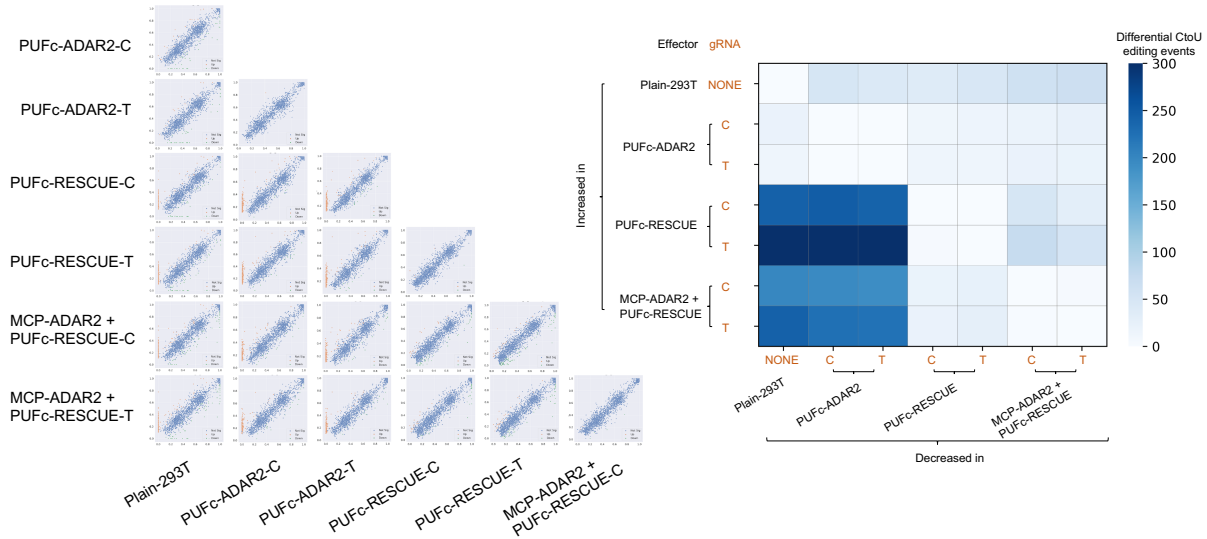

**Supplemental figures S17. Off-target events of C-to-U base editing induced by bi-functional CREST system.** Samples from column 1 and 4 in Figure 5 A-C were sent for RNA deep sequencing and subjected to analyze differentially edited events between groups. Left: Scatter plot of A-to-G conversion rates on edited sites across all samples and transfected effectors for each comparison were labeled as x and y axis. C stands for control gRNA and T stands for targeting gRNA. Right: Heatmap to summarize the number of differentially edited events for all pairwise comparisons. Effectors and gRNAs were labeled on both y and x axis. Significant differentially edited events were filter by  $FDR \leq 0.05$  and absolute difference in editing percentage  $\geq 10\%$ .

## Supplementary Protein Sequences

### 3xFLAG-ddpspCas13b:

MDYKDHDGDYKDHDIDYKDDDDKIDGGGGSDRRAMNIPALVENQKKYFGTYSVMAMLNAQTVLDDHIQK  
VADIEGEQNENNENLWFHPVMSHLYNAKNGYDKQPEKTMFIERLQSYFPFLKIMAENQREYSNGKYKQ  
NRVEVNSNDIFEVLKRAFGVLKMYRDLTNAYKTYEELNDGCEFLTSTEQPLSGMINNYTVLALRNMNER  
YGYKTEDLAFIQDKRFKFKDAYGKKKSQVNTGFFLSLQDYNGDTQKKLHLSGVGIALLICFLDKQYINIF  
LSRLPIFSSYNAQSEERRIIRSFGINSIKLPKDRIHSEKSNKSVAMDMLNEVKRCPDELFTTLSAEKQSRFR  
IISDDHNEVLMKRSSDRFVPLLLQYIDYGKLFDFHVFHVNMGKLRLLAAAATCIDGQTRVRIEQPLNGFG  
RLEEAEEMRKQENGTFGNSGIRIRDFENMKRDDANPANYPIVDTYTHYLENNKVMFINDKEDSAPLLP  
VIEDDRYVVKTIPTSCRMSTLEIPAMAFHMFLLFGSKKTEKLIVDVHNRYKRLFQAMQKEEVTAEENIASFGIAE  
SDLPQKILDLSIGNAHGKDVDAFIRLTVDDMLTDTERRIKRFKDDRKSIRSADNKMGRGFKQISTGKLAD  
FLAKDIVLFQPSVNDGENKITGLNYRIMQSAIAVYDSGDDYEAQQFKLMFEKARLIGKGTTEPHFPLYKVF  
FARSIPANAVEFYERYLIERKFYLTGLSNEIKKGNRVDVFPFIRRDQNKWKTAMPKTLGRIYSEDLPVELPR  
QMFDNEIKSHLKSLLPQMEGIDFNNANVTYLIAEYMKRVLDDDFQTFYQWNRNYRYMDMLKGEYDRKGS  
QHCFTSVEEREGLWKERASRTERYRKQASNKIRSQRMRNASSEIETILDKRLSNRNEYQKSEKVIIR  
YRQDALLFLLAKKTLTELADFDGERFKLKEIMPDAEKILSEIMPMSFTFEKGGKYTITSEGMKLNKYGD  
FFVLASDKRIGNLLELVGSDIVSKEDIMEEFNKYDQCRPEISSIVFNLEKWAFDTYPELSARVDREKVDK  
SILKILLNNKNINKEQSDILRKIRNAFDANNYPDKGVVEIKALPEIAMSIIKAFGEYAIMKGGRRGGGGSGGG  
GSGGGGSGPA

### hcoRBFOX1N-MCP-RBFOX1C

MNCEREQLRGNQEAAPDTMAQPYASAQFAPPQNGIPAETAPHPHPAPEYTGQTTVPEHTLNL YPP  
AQTHSEQSPADTSAQTVSGTATQTDDAAPTGGQPQTQPSSENTENKSQPKGGGGSGRAMASNFTQFVL  
VDNNGTGDVTVAPSNFANGVAEWISSNSRSQAYKVTCSVRQSSAQKRKYTIKVEVPKVATQTVGGVELP  
VAAWRSYLNEMELTIPIFATNSDCELVKAMQGLLKDGNPIPSAIAANSIYSAAGRRGGGGSGGGGSGGGG  
SGPANATARVMTNKKTVNPNYTNWKLNPVVGAVYSPEFYAGTVLLCQANQEGSSMYSAPSSLVYTSAM  
PGFPYPAATAAAAYRGAHLRGRGRTVYNTFRAAAPPPPPIPAYGGVYQDGFYGADIYGGYAAARYAQPT  
PATAAAYSYSYGRVYAADPYHHALAPPTYGVGAMNAFAPLTDKTRSHADDVGLVLSLQASIRGGY  
NRFAPY

### hcoRBFOX1N-PUF<sub>c</sub>-2xNLS-RBFOX1C

MNCEREQLRGNQEAAPDTMAQPYASAQFAPPQNGIPAETAPHPHPAPEYTGQTTVPEHTLNL YPP  
AQTHSEQSPADTSAQTVSGTATQTDDAAPTGGQPQTQPSSENTENKSQPKGGGGSGRAGILPPKKRKY  
SRGRSRLLEDFRNRYPNLQLREIAGHIMEFSQDQHGSRFIQLKLERATPAERQLVFNEILQAAYQLMVD  
VFGNYVIQKFFEFGSLEQKLALAERIRGHVLSLALQMYGSRVIEKALEFIPSDQQNEMVRELDGHVLCVK  
DQNGNHVVQKCIQVQPSLQFIIDAFKQVVALSTHPYGCRIQRILEHCLPDQTLPILEELHQHTEQLV  
QDQYGSYVIEHVLEHGRPEDKSKIVAEIRGNVLSLQHKFANNVVQKCVTHASRTERAVLIDEVCTMNDG  
PHSALYTMMDQYANYVQKMDVAEPGQRKIVMHKIRPHIATLRKYTYGKHILAKLEKYYMKNVLDLGD  
PKKKRKYVDPKKRKYVGGRRGGGGSGGGGSGGGGSGPANATARVMTNKKTVNPNYTNWKLNPVVGAVY  
SPEFYAGTVLLCQANQEGSSMYSAPSSLVYTSAMPGFYPAATAAAAYRGAHLRGRGRTVYNTFRAAA  
PPPPPIPAYGGVYQDGFYGADIYGGYAAARYAQPTPATAAAYSYSYGRVYAADPYHHALAPPTYGVGA  
MNAFAPLTDKTRSHADDVGLVLSLQASIRGGYNRFAPY

### MCP-NES-ADAR2DD(E448Q)

MASNFTQFVLVDNNGTGDVTVAPSNFANGVAEWISSNSRSQAYKVTCSVRQSSAQKRKYTIKVEVPKVA  
TQTVGGVELPVAWRSYLNEMELTIPIFATNSDCELVKAMQGLLKDGNPIPSAIAANSIYSAAGRRGGGG  
GGGGSGGGGSGPALQLPLRLTLGSGGGGSQLHLPQVLADAVSRLVLGKFGDLTDFSSPHARRKVL  
AGVMTTGTVDKAKVISVSTGKTCINGEYMSDRGLALNDCHAEIISRRSLLRFLYTQLELYLNNKDDQKR  
SIFQKSERGGFRLKENVQFHLYISTSPCGDARIFSPHEPILEPADRHPPNRKARGQLRTKIESGGGTIPVR  
SNASIQTWDGVLQGERLLTMSCDKIARWVVGIGQSLLSIFVEPIYFSSIILGSLYHGDHLSRAMYQRISNI  
EDLPPLYTLNKPLLSGISNAEARQPGKAPNFSVNWTVGDSAIEVINATTGKDELGRASRLCKHALYCRWM  
RVHGKVP SHLLRSKITKPNVYHESKLAKEYQAAKARLFTAFIKAGLGAWVEKPTAQDQFSLTNV

### PUF<sub>c</sub>-NES-ADAR2DD(E488Q)

MNVGGGGSGGGGSGGGGSGRASRGRSRLLEDFRNRYPNLQLREIAGHIMEFSQDQHGSRFIQLKLE  
RATPAERQLVFNEILQAAYQLMVDVFGNYVIQKFFEFGSLEQKLALAERIRGHVLSLALQMYGSRVIEKAL

EFIPSDQQNEMVRELDGHVLCVKDQNGNHVVQKCIQVQPSLQFIIDAFKQVVFALSTHPYGCRVIQR  
ILEHCLPDQTLPILEELHQHTEQLVQDQYGSYVIEHVLEHGRPEDKSKIVAEIRGNVVLVLSQHKFANNVVQ  
KCVTHASRTERAVLIDEVCTMNDGPHSALYTMMKDQYANYVVQKIDVAEPGQRKIVMHKIRPHIATLRK  
YTYGKHILAKLEKYYMKNQVLDLGGRRGGGGSGGGGSGGGGSGPAQLPPLERLTLGSGGGGSQLHLP  
QVLADAVSRLVVGKFGDLTDFSSPHARRKVLAVVMTTGTVDKAKVISVSTGTCINGEYMSDRGLAL  
NDCHAEIISRRSLLRFLYTQLELYLNNKDDQKRSIFQKSERGGFRLKENVQFHLYISTSPCGDARIFSPHEP  
ILEEPADRHPNRKARGQLRRTKIESGQGTIPVRSNASIQTWDGVLQGERLLTMSCSDKIARWNVVGIQGS  
LSIFVEPIYFSSIIIGSLYHGDHLSRAMYQRISNIEDLPPLYTLNKPLLSGISNAEARQPGKAPNFSVNWTG  
DSAIEVINATTGKDELGRASRLCKHALYCRWMRVHGKVPShLLRSKITKPNVYHESKLAKEYQAAKARL  
FTAFIKAGLGAWVEKPTEQDQFSLTNV

PUF<sub>c</sub>-NES-RESCUE-S

MNVGGGGSGGGGSGGGGSGRASRGRSRLLEDFRNNRYPNLQLREIAGHIMEFSQDQHGSRFIQLKLE  
RATPAERQLVFNEILQAAYQLMVDVFGNYVIQKFFEFGSLEQKLALAERIRGHVLSLALQMYGSRVIEKAL  
EFIPSDQQNEMVRELDGHVLCVKDQNGNHVVQKCIQVQPSLQFIIDAFKQVVFALSTHPYGCRVIQR  
ILEHCLPDQTLPILEELHQHTEQLVQDQYGSYVIEHVLEHGRPEDKSKIVAEIRGNVVLVLSQHKFANNVVQ  
KCVTHASRTERAVLIDEVCTMNDGPHSALYTMMKDQYANYVVQKIDVAEPGQRKIVMHKIRPHIATLRK  
YTYGKHILAKLEKYYMKNQVLDLGGRRGGGGSGGGGSGGGGSGPAQLQKLEELGSQLHLPQVLADAV  
SRLVIGKFGDLTDFSSPHARRIGLAGVMTTGTVDKAKVICVSTGAKCINGEYLSDRGLALNDCHAEI  
SRRSLLRFLYTQLELYLNNEDDQKRSIFQKSERGGFRLKENIQFHLYISTSPCGDARIFSPHEAILEPADR  
HPNRKARGQLRRTKIEAGQGTIPVRNNASIQTWDGVLQGERLLTMSCSDKIARWNVVGIQGSLLSIFVEPI  
FSSIIIGSLYHGDHLSRAMYQRISNIEDLPPLYTLNKPLLTGISNAEARQPGKAPNFSVNWTGDSAIEVINA  
TTGKDELGRASRLCKHALYCRWMRVHGKVPShLLRSKITKPNVYHETKLAKEYQAAKARLFTAFIKAGL  
GAWVEKPTEQDQFSLTVDGSGSGSLPPLERLTL

NES-PUF<sub>c</sub>-ADAR2DD(E488Q)-splitN

MLPPLERLTLGGGGSGRASRGRSRLLEDFRNNRYPNLQLREIAGHIMEFSQDQHGSRFIQLKLERATPAE  
RQLVFNEILQAAYQLMVDVFGNYVIQKFFEFGSLEQKLALAERIRGHVLSLALQMYGSRVIEKALEFIPSDQ  
QNEMVRELDGHVLCVKDQNGNHVVQKCIQVQPSLQFIIDAFKQVVFALSTHPYGCRVIQRILEHCLP  
DQTLPILEELHQHTEQLVQDQYGSYVIEHVLEHGRPEDKSKIVAEIRGNVVLVLSQHKFANNVVQKCVTHAS  
RTERAVLIDEVCTMNDGPHSALYTMMKDQYANYVVQKIDVAEPGQRKIVMHKIRPHIATLRKYTYGKHIL  
AKLEKYYMKNQVLDLGGRRGGGGSGGGGSGGGGSGPAQLHLPQVLADAVSRLVVGKFGDLTDFSSPH  
ARRKVLAVVMTTGTVDKAKVISVSTGTCINGEYMSDRGLALNDCHAEIISRRSLLRFLYTQLELYLNN  
KDDQKRSIFQKSERGGFRLKENVQFHLYISTSPCGDARIFSPHEPIEE

NES-PUF<sub>c</sub>-ADAR2DD(E488Q)-splitC

MLPPLERLTLGGGGSGRASRGRSRLLEDFRNNRYPNLQLREIAGHIMEFSQDQHGSRFIQLKLERATPAE  
RQLVFNEILQAAYQLMVDVFGNYVIQKFFEFGSLEQKLALAERIRGHVLSLALQMYGSRVIEKALEFIPSDQ  
QNEMVRELDGHVLCVKDQNGNHVVQKCIQVQPSLQFIIDAFKQVVFALSTHPYGCRVIQRILEHCLP  
DQTLPILEELHQHTEQLVQDQYGSYVIEHVLEHGRPEDKSKIVAEIRGNVVLVLSQHKFANNVVQKCVTHAS  
RTERAVLIDEVCTMNDGPHSALYTMMKDQYANYVVQKIDVAEPGQRKIVMHKIRPHIATLRKYTYGKHIL  
AKLEKYYMKNQVLDLGGRRGGGGSGGGGSGGGGSGPAPADRHPNRKARGQLRRTKIESGQGTIPVRSNA  
SIQTWDGVLQGERLLTMSCSDKIARWNVVGIQGSLLSIFVEPIYFSSIIIGSLYHGDHLSRAMYQRISNIEDL  
PPLYTLNKPLLSGISNAEARQPGKAPNFSVNWTGDSAIEVINATTGKDELGRASRLCKHALYCRWMRVH  
GKVPShLLRSKITKPNVYHESKLAKEYQAAKARLFTAFIKAGLGAWVEKPTEQDQFSLTNV

NES-ddPspCas13b-ARA2DD(E488Q)-SplitC

MLPPLERLTLGGGGSGRAMNIPALVENQKKYFGTYSVMAMLNAQTVLDHIQKVADIEGEQNENNENLWF  
HPVMShLYNAKNGYDKQPEKTMFIIERLQSYFPFLKIMAENQREYSNGKYKQNRVEVNSNDIFEVLKRAF  
GVLKMYRDLTNAKYTYEELNDGCEFLTSTEQPLSGMINNYTVALRNMNERYGYKTEDLAFIQDKRFKF  
VKDAYGKKKSQVNTGFFLSLQDYNGDTQKHLHSGVGIALLICLFLDKQYINIFLSRPLIFSSYNAQSEERRI  
IIRSFINSIKLPKDRIHSEKSNKSVAMDMLNEVKRCPDELFTTLSAEKQSRFRIISDDHNEVLMKRSSDRF  
VPLLLQYIDYGKLFDIRFHVNMGKRLRYLLAAAATCIDGQTRVRIEQPLNGFGRLLEEAEETMRKQENGTFG  
NSGIRIRDFENMKRDDANPANYPYIVDTYTHYLENNKVEMFINDKEDSAPLLPIEDDRYVVKTIIPSCRMS  
TLEIPAMAFHMFLFGSKKTEKLIVDVHNRYKRLFQAMQKEEVTAEINASFIAESDLPQKILDILISGNAHGK  
DVDAFIRLTVDDMLTDTERRIKRFKDDRKSIRSADNKMGKRGFKQISTGKLADFLAKDIVLFQPSVNDGEN

KITGLNYRIMQSAIAVYDSGDDYEAKQQFKLMFEKARLIGKGTTEPHFPLYKVFARSIPANAVEFYERYLIE  
RKFYLTGLSNEIKKGNRVDVPPFIRRDQNKWKTPAMKTLGRIYSEDLVELPRQMFMDNEIKSHLKSPLQME  
GIDFNNANVTYLIAEYMKRVLDDDFQTFYQWNRNYRYMDMLKGEYDRKGSGLQHCFTSVEEREGLWKER  
ASRTERYRKQASNKIRSNRQMRNASSEIEIILDKRLSNSRNEYQKSEKVIIRRYRVQDALLFLLAKKTLTE  
LADFDGERFKLKEIMPDAEKGILSEIMPMSFTFEKGGKKYTITSEGMKLNKNGDFFVLASDKRIGNLLELVG  
SDIVSKEDIMEEFNKYDQCRPEISSIVFNLEKWAFDTYPELSARVDREKVDKFSILKILLNNKNINKEQSDI  
LRKIRNAFDANNYPDKGVVEIKALPEIAMSIIKAFGEYAIMKGGRRGGGGSGGGGSGGGGSGPAPADRHP  
NRKARGQLRTKIESGQGTIPVRSNASIQTWDGVLQGERLLTMSCSDKIARWNVVGIIQGSLLSIFVEPIYFS  
SIILGSLYHGDHLSRAMYQRISNIEDLPPLYTLNKPLLGSISNAEARQPGKAPNFSVNWTVGDSAIEVINATT  
GKDELGRASRLCKHALYCRWMRVHGKVPShLLRSKITKPNVYHESKLAKEYQAAKARLFTAFIKAGLGA  
WVEKPTEQDQFSLTNV

NES-ddPspCas13b-RESCUE-S-splitN

MLPPLERLTI GGGGSGRAMNIPALVENQKKYFGTYSVMAMLNAQTVLDHIQKVADIEGEQNENNENLWF  
HPVMSHLYNAKNGYDKPEKTMFIIERLQSYFPFLKIMAENQREYSNGKYKQNRVEVNSNDIFEVLKRAF  
GVLKMYRDLTNAKYTYEEKLNDGCEFLTSTEQPLSGMINNYTVALRNMNERYGYKTEDLAFIQDKRFKF  
VKDAYGKKKSQVNTGFFLSLQDYNGDTQKKLHLSGVGIALLICLFLDKQYINIFLSRPLIFSSYNAQSEERRI  
IIRSGINSIKLPKDRIHSEKSNKSVAMDMLNEVKRCPDELFTTLSAEKQSRFRIISDDHNEVLMKRSSDRF  
VPLLLQYIDYGKLFDIRHFVNMGKRLRYLLAAAATCIDGQTRVRVIEQPLNGFGRLEEAETMRKQENGTFG  
NSGIRIRDFENMKRDDANPANYPYIVDTYTHYLENNKVEMFINDKEDSAPLLPVIEDDRYVVKTIPTSCMS  
TLEIPAMAFHMFVFGSKKTEKLIVDVHNRYKRLFQAMQKEEVTAEIASFGIAESDLPQKILDILISGNAHGK  
DVDAFIRLTVDDMLTDTERRIKRFKDDRKSIRSADNKMGKRGFKQISTGKLADFLAKDIVLFQPSVNDGEN  
KITGLNYRIMQSAIAVYDSGDDYEAKQQFKLMFEKARLIGKGTTEPHFPLYKVFARSIPANAVEFYERYLIE  
RKFYLTGLSNEIKKGNRVDVPPFIRRDQNKWKTPAMKTLGRIYSEDLVELPRQMFMDNEIKSHLKSPLQME  
GIDFNNANVTYLIAEYMKRVLDDDFQTFYQWNRNYRYMDMLKGEYDRKGSGLQHCFTSVEEREGLWKER  
ASRTERYRKQASNKIRSNRQMRNASSEIEIILDKRLSNSRNEYQKSEKVIIRRYRVQDALLFLLAKKTLTE  
LADFDGERFKLKEIMPDAEKGILSEIMPMSFTFEKGGKKYTITSEGMKLNKNGDFFVLASDKRIGNLLELVG  
SDIVSKEDIMEEFNKYDQCRPEISSIVFNLEKWAFDTYPELSARVDREKVDKFSILKILLNNKNINKEQSDI  
LRKIRNAFDANNYPDKGVVEIKALPEIAMSIIKAFGEYAIMKGGRRGGGGSGGGGSGGGGSGPAQLHLPO  
VLADAVSRLVIGKFGDLTDFSSPHARRIGLAGVVMTTGTDVKDAKVICVSTGAKCINGEYLSDRGLALND  
CHAEIVSRRSLLRFLYTQLELYLNNEDDQKRSIFQKSERGGFRLKENIQFHYISTSPCGDARIFSPHEAILE  
E

NES-PUFc-RESCUE-S-splitC

MLPPLERLTI GGGGSGRASRGRSRLLEDFRNNRYPNLQLREIAGHIMEFSQDQHGSRFIQLKLERATPAE  
RQLVFNEILQAAYQLMVDVFGNYVIQKFFEFGSLEQKLALAEIRIGHVLSLALQMYGSRVIEKALEFIPSDQ  
QNEMVRELDGHVLCVKVDQNGNHVVQKCIQVQPSLQFIIDAFKGGQVFALSTHPYGCRVIQRILEHCLP  
DQTLPILEELHQHTEQLVQDQYGSYVIEHVLEHGRPEDKSKIVAEIRGNVLSQHKFANNVQKCVTHAS  
RTERAVLIDEVCTMNDGPHSALYTMKQDYANYVQKIDVAEPGQRKIVMHKIRPHIATLRKYTYGKHIL  
AKLEKYYMKNVLDLGGRRGGGGSGGGGSGGGGSGPAPADRHPNRKARGQLRTKIEAGQGTIPVRNNA  
SIQTWDGVLQGERLLTMSCSDKIARWNVVGIIQGSLLSIFVEPIYFSSIIILGSLYHGDHLSRAMYQRISNIEDL  
PPLYTLNKPLLTGISNAEARQPGKAPNFSVNWTVGDSAIEVINATTGKGELGRASRLCKHALYCRWMRVH  
GKVPShLLRSKITKPNVYHETKLAKEYQAAKARLFTAFIKAGLGAWVEKPTEQDQFSLT

**Supplementary Table S1**

|                               |                            |
|-------------------------------|----------------------------|
| PCR Primers                   |                            |
| AtoG reporter editing Forward | GGCTCCGAATTCACCGGTG        |
| AtoG reporter editing Reverse | CTTCTTCTGCATTACGGGGC       |
| CtoU reporter editing Forward | GTGGGAGCGCGTGATGAACT       |
| CtoU reporter editing Reverse | AAAGCTGGGTCTGAATTCTTAATTAA |
| KRAS Forward                  | CCAGGCCTGCTGAAAATGAC       |
| KRAS Reverse                  | GAAGGCATCATCAACACCCAGA     |
|                               |                            |
| Sanger sequencing primer      |                            |
| AtoG reporter sequencing      | GCCCGACAACCACTACCTGA       |
| CtoU reporter sequencing      | TGGACATCACCTCCCACAACG      |
| KRAD sequencing               | CTGGTCCCTCATTGCACTG        |

|                        |                                     |
|------------------------|-------------------------------------|
| qRT-PCR primers        |                                     |
| SMN2-Forward           | GCTCTTAAGGCTAGAGTACTTAATACGA        |
| SMN2-Inclusion-Reverse | CTTCTTTTTGATTTTGTCTAAAACCCATATAATAG |
| SMN2-Exclusion-Reverse | CTCTATGCCAGCATTTCATATAATAG          |
| KIF21A-Forward         | TGGAAGGTCGACTCAAACAA                |
| KIF21A-Reverse         | TGGGCTGTTTAAAGGAGCAT                |

|                             |                                 |
|-----------------------------|---------------------------------|
| gRNA spacer sequence oligos |                                 |
| Ctrl                        | ACTCAAAGGAAGTGACAAGAA           |
| SMN1-gRNA1                  | GTAAGATTCACCTTCATAATGC          |
| SMN1-gRNA2                  | GTAGGGATGTAGATTAACCTTT          |
| SMN1-gRNA3                  | GCTGGTCTGCCTACTAGTGATA          |
| mScarlet-A-to-G-2           | GACATGAACTGAGGGGACAGGATGTCCCA   |
| mScarlet-A-to-G-4           | GATGAACTGAGGGGACAGGATGTCCCAGG   |
| mScarlet-A-to-G-6           | GATGAACTGAGGGGACAGGATGTCCCAGGAG |
| mScarlet-A-to-G-8           | GAACTGAGGGGACAGGATGTCCCAGGAGAA  |
| mScarlet-A-to-G-10          | GACTGAGGGGACAGGATGTCCCAGGAGAAGG |
| mScarlet-A-to-G-12          | GTGAGGGGACAGGATGTCCCAGGAGAAGGGC |
| mScarlet-A-to-G-14          | GAGGGGACAGGATGTCCCAGGAGAAGGGCAG |
| mScarlet-A-to-G-16          | GGGACAGGATGTCCCAGGAGAAGGGCAGGG  |
| mScarlet-A-to-G-18          | GACAGGATGTCCCAGGAGAAGGGCAGGGGG  |
| mScarlet-A-to-G-20          | GCAGGATGTCCCAGGAGAAGGGCAGGGGGCC |
| mScarlet-A-to-G-22          | GGATGTCCCAGGAGAAGGGCAGGGGGCCAC  |
| mScarlet-A-to-G-24          | GATGTCCCAGGAGAAGGGCAGGGGGCCACCC |

|                    |                                                         |
|--------------------|---------------------------------------------------------|
| mScarlet-A-to-G-26 | GTCCAGGAGAAGGGCAGGGGGCCACCCTT                           |
| mScarlet-A-to-G-28 | GCCCAGGAGAAGGGCAGGGGGCCACCCTTGG                         |
| mScarlet-A-to-G-30 | GCAGGAGAAGGGCAGGGGGCCACCCTTGGTC                         |
| mScarlet-C-to-U-20 | CTGCCTGTCCCACATCAATGGAGATCCAAAC                         |
| mScarlet-C-to-U-22 | GTGGATCTCCATTGATGTGGGACAGGCAGAT                         |
| mScarlet-C-to-U-24 | GATCTCCATTGATGTGGGACAGGCAGATCA                          |
| mScarlet-C-to-U-26 | GTCTCCATTGATGTGGGACAGGCAGATCAGG                         |
| mScarlet-C-to-U-28 | GTCCATTGATGTGGGACAGGCAGATCAGGGC                         |
| APC                | GCCACTCCCAACAGGTTTCACAGTAAGCGC                          |
| MECP2              | GTCCGTGTCCAGCCTTCAGGCAGGGTGGGGT                         |
| SMN1               | GCTTCTGACCAAATGGCAGAACATTTGTCCC                         |
| CFTR               | GCTTTCCTCCACTGTTGCAAAGTTATTGAA                          |
| HBB                | gCTCTGGGTCCAAGGGTAGACCACCAGCAGC                         |
| SOS1               | gCATCTGTCCTTTCTACTGTATCTTCTATAT                         |
| MYH11              | gTGGACTGCCGCTCCTGCACCTGCGCCTCCA                         |
| SCN11A             | gCAACAGCCCAGGGTTAAGTTAATCAGGTAGA                        |
| KIF21A-gRNA1       | gACAATTAGTAATTCATGCAGCTG                                |
| KIF21A-gRNA2       | gTGCAAAAACCACTTGACCGCCAA                                |
| KIF21A-gRNA3       | GACTTAGTGTGTTTGTGGGCATG                                 |
| KRAS-AtoG-editing  | GTTTCTCCATCAATTACCACTTGCTTCCTGTAGGAATCCTCTAT<br>TGTTGGA |
| KRAS-CtoU-editing  | gATTCCCTCCACAAAATGATTCTGAATTAGCT                        |

| RNA scaffold sequence |                                                                                                                                                                       |
|-----------------------|-----------------------------------------------------------------------------------------------------------------------------------------------------------------------|
| 1xMS2                 | CGTACACCATCAGGGTACG                                                                                                                                                   |
| 2xMS2                 | CGTACACCATCAGGGTACGCagatGCGTACACCATCAGGGTACG                                                                                                                          |
| 1xPBSc                | ttgatgta                                                                                                                                                              |
| 2xPBSc                | ttgatgtagccttgatgta                                                                                                                                                   |
| 3xPBSc-Loop           | ttgatgtaAGGGCCCAttgatgtaAGGGCCCAttgatgta                                                                                                                              |
| 5xPBSc-Loop           | ttgatgtaAGGGCCCAttgatgtaAGGGCCCAttgatgtaAGCGCGCAttgatgtaAGCG<br>CGCAttgatgta                                                                                          |
| 10xPBSc-Loop          | ttgatgtaAGGGCCCAttgatgtaAGGGCCCAttgatgtaAGCGCGCAttgatgtaAGCG<br>CGCAttgatgtaAGCCCGGAttgatgtaACCGGGCAttgatgtaAGGTACGCCAttgat<br>gtaAGGCGTACCAttgatgtaTCGTACCCAttgatgta |
| 15xPBSc-Loop          | ttgatgtaaGGCCGCTttgatgtaACGCGGTCAttgatgtaAGACCGCGAttgatgtaACT<br>CGGAttgatgtaACCGAGATTttgatgtaAGGGCCCAttgatgtaAGGGCCCAttgatgta                                        |

|             |                                                                                                                                                                      |
|-------------|----------------------------------------------------------------------------------------------------------------------------------------------------------------------|
|             | AGCGCGCAttgatgtaAGCGCGCAttgatgtaAGCCCGGAttgatgtaACCGGGCAttgatgtaAGGTACGCCAttgatgtaAGGCGTACCAttgatgtaTCGTACCCAttgatgta                                                |
| 5xPBSc-GCC  | ttgatgtagccttgatgtagccttgatgtagccttgatgtagccttgatgta                                                                                                                 |
| 15xPBSc-GCC | ttgatgtagccttgatgtagccttgatgtagccttgatgtagccttgatgtaagatttgatgtagccttgatgtagccttgatgtagccttgatgtagccttgatgtaagatttgatgtagccttgatgtagccttgatgtagccttgatgtagccttgatgta |

**Supplementary Table S2**

| Plasmid                                                               | Description/Experimental Purpose                              | ID     |
|-----------------------------------------------------------------------|---------------------------------------------------------------|--------|
| <a href="#">pCR8-PspCas13b_gRNA[ccdbCam]_1xMS2b</a>                   | backbone for gRNA cloning of dspCas13b tagged by 1xMS2        | 196847 |
| <a href="#">pCR8-PspCas13b_gRNA[ccdbCam]-2xPP7</a>                    | backbone for gRNA cloning of dspCas13b tagged by 2xPP7        | 196846 |
| <a href="#">gzk326-dspCas13b_gRNA[ccdbCam]-5xPBSc_Loop</a>            | backbone for gRNA cloning of dspCas13b tagged by 5xPBSc_Loop  | 196845 |
| <a href="#">gzk328-dspCas13b_gRNA[ccdbCam]-10xPBSc_Loop</a>           | backbone for gRNA cloning of dspCas13b tagged by 10xPBSc_Loop | 196844 |
| <a href="#">pzk490-pmax-NES-dspCas13b(AAAA)-FseI[ADAR2-DD-splitC]</a> | Express NES-dspCas13b(AAAA)-FseI[ADAR2-DD-splitC]             | 196843 |
| <a href="#">pzk491-pmax-NES-PUFc-FseI[ADAR2-DD-splitC]</a>            | Express NES-PUFc-FseI[ADAR2-DD-splitC]                        | 196842 |
| <a href="#">pzk488-pmax-NES-PUFc-FseI[ADAR2-DD-splitN]</a>            | Express NES-PUFc-FseI[ADAR2-DD-splitN]                        | 196841 |
| <a href="#">pmax-MCP_NES-ADARdd(E488Q)</a>                            | Express MCP_NES-ADARdd(E488Q)                                 | 196840 |
| <a href="#">pmax-hcoRBFOX1N-MCP-RBFOX1C</a>                           | Express hcoRBFOX1N-MCP-RBFOX1C(190-397)                       | 196839 |



|                                                                        |                                                  |        |
|------------------------------------------------------------------------|--------------------------------------------------|--------|
| <a href="#"><u>pmax-hcoRBFOX1N-PCP-RBFOX1C</u></a>                     | Express hcoRBFOX1N-PCP-RBFOX1C(190-397)          | 196838 |
| <a href="#"><u>pmax-PUFc_NES-ADARdd(E488Q)</u></a>                     | Express PUFc_NES-ADARdd(E488Q)                   | 196837 |
| <a href="#"><u>pzk384-pmax-PUFc-FseI-RESCUE-SalI-NES</u></a>           | Express PUFc-RESCUE-S                            | 196831 |
| <a href="#"><u>pmax-hcoRBFOX1N-PUFc-RBFOX1C</u></a>                    | Express hcoRBFOX1N-PUFc-RBFOX1C(190-397)         | 196830 |
| <a href="#"><u>pmax-3xFLAG_3xNLS_dPspCas13b(AAAA)_2xNLS-Clover</u></a> | Express dpdpCas13b with AAAA mutation and Clover | 196829 |
| <a href="#"><u>pzk408-pmax-3xflag-dpspCas13b(AAAA)-NES</u></a>         | Express dpdpCas13b with AAAA mutation            | 196828 |
| <a href="#"><u>pzk228-pmax-SgrAI[3xFLAG]-AscI-dPspCas13b(AAAA)</u></a> | Express dpdpCas13b with AAAA mutation            | 196827 |
